# Supplementary material
Source: Springer Nature journal article supplement (https://www.springermedizin.de/resource/supplementary/12967_2008_307_MOESM7_ESM.pdf/9576168)

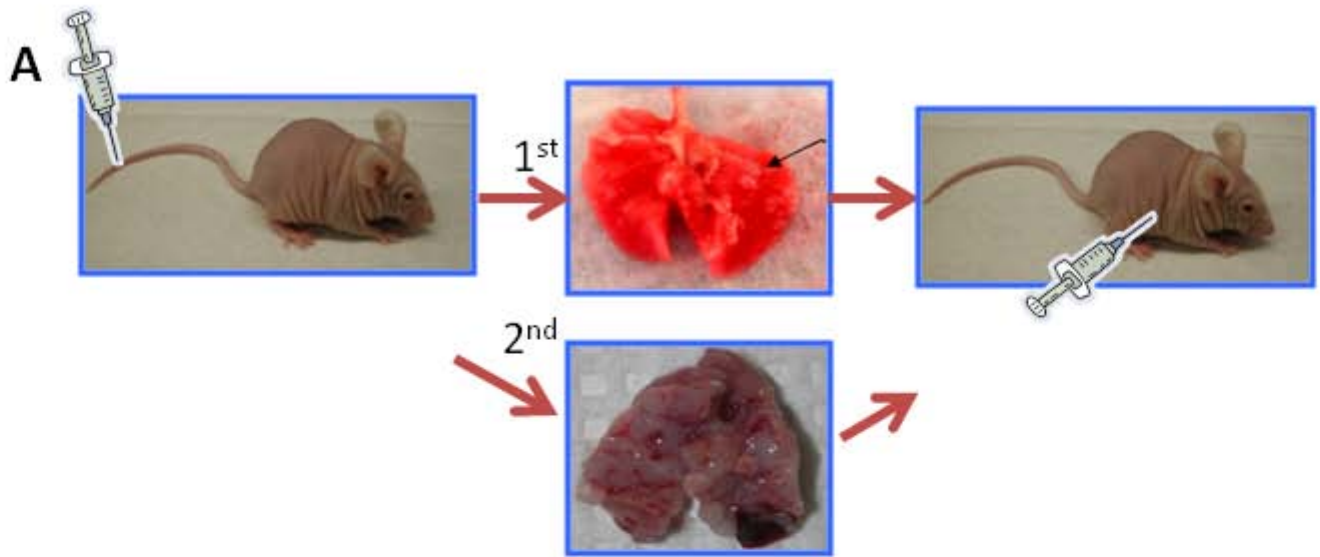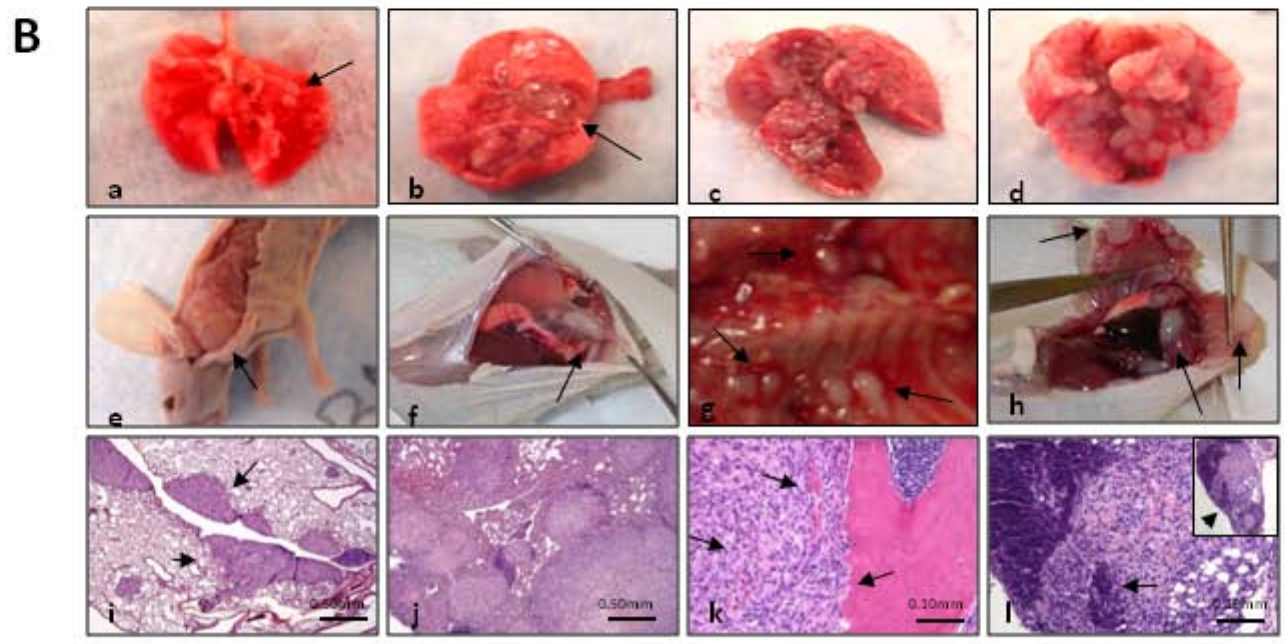

Supplement: MOESM7 [file 9576168]
